# Supplementary material for: Microbiome spectra and prevalent colibactin-associated mutational process in Japanese colorectal cancer
Source: Research Square preprint supplement (doi:10.21203/rs.3.rs-4967540/v1), 2024-09-02
Supplement: Supplementary file 1 [file 24ee6a67523fb395aec37c4a.pdf]

Table 1

Clinical data and genomic abnormalities in colorectal cancer subtypes categorized based on gut microbiota.

| Classification based on gut microbiota |                    |                   |                      |           |
|----------------------------------------|--------------------|-------------------|----------------------|-----------|
|                                        | Subtype 1          | Subtype 2         | Subtype 3            | Subtype 4 |
| Age                                    |                    | Older             | Younger              |           |
| Body mass index                        |                    | Higher            |                      | Lower     |
| Smoking history                        |                    | Less              |                      |           |
| Alcohol consumption                    | Higher             |                   |                      |           |
| Hypermutated phenotype                 |                    | More              |                      |           |
| Significantly mutated genes            |                    | ARID1A, B2M, PTEN |                      |           |
| Mutational signatures                  | ID1                | SBS44, ID2        | SBS88, ID18, Novel1  |           |
| Copy number alterations                | More amplification |                   |                      |           |
| Timing of CNN-LOH / loss+gain          |                    | Late              | Early                |           |
| Immune cell profiling                  |                    |                   | Regulatory T cells ↑ |           |
| Microenvironment                       |                    |                   | Immunosuppressive    |           |
| Consensus molecular subtype (CMS)      |                    | CMS1              |                      |           |
| Prognosis                              |                    |                   | Poorer               |           |

CNN-LOH, copy number neutral-loss of heterozygosity
