# Supplementary material for: Microbiome spectra and prevalent colibactin-associated mutational process in Japanese colorectal cancer
Source: Research Square preprint supplement (doi:10.21203/rs.3.rs-4967540/v1), 2024-09-02
Supplement: Supplementary file 1 [file 133fac73081dd0aefc604d52.xlsx]

## Sheet: Table 1
Extended Data Table 1. Clinical data for 138 colorectal cancer patients in this study.
Genome ID	Metagenome ID	Subtype according to SHAP (SHapley Additive exPlanations)	Age	Sex	Body mass index	Stage UICC	Tumor location	Right or Left-sided colorectal cancer	Multiple lesions	Brinkman Index	Alcohol	Hypermutated phenotype	Progression-free survival (PFS) (months)	PFS event	Overall survival (OS) (months)	OS event	CDS depth	FREQ 20x	FREQ 15x	FREQ 10x
CM001	10284	3	73	Male	23.3355	IV	Rectosigmoid	Left	Single	800	Drinker	-	3.43333	+	23.0667	+	50.7406	0.972927	0.98148	0.984856
CM002	10323	1	68	Female	21.7865	II	Rectosigmoid	Left	Single	279	Drinker	-	63.0667	-	63.0667	-	43.5565	0.974974	0.980665	0.983668
CM003	10260	1	63	Female	20.1348	III	Ascending	Right	Single	0	Non-drinker	-	77.9	-	77.9	-	42.1805	0.964597	0.978445	0.983259
CM004	10307	1	49	Female	22.6409	III	Sigmoid	Left	Single	0	Drinker	-	87.6667	-	87.6667	-	49.2314	0.978136	0.981656	0.98399
CM005	10359	1	72	Male	30.1103	III	Transverse	Right	Single	550	Drinker	-	63.6	-	63.6	-	47.3255	0.971573	0.981264	0.98481
CM006	10397	3	53	Female	24.8358	IV	Rectum	Left	Single	0	Drinker	-	27.1	+	41.6333	+	48.0767	0.976318	0.981352	0.984011
CM007	10380	3	28	Male	26.2976	III	Rectum	Left	Single	0	Non-drinker	-	19.9667	+	89.0333	-	54.4064	0.97877	0.982508	0.985061
CM008	10459	Unestimated	73	Female	19.563	II	Rectum	Left	Single	0	Non-drinker	-	62.6	-	62.6	-	46.6762	0.973812	0.980454	0.983741
CM009	10416	4	56	Female	21.4536	IV	Ascending	Right	Single	0	Drinker	-	1.96667	+	34.1667	-	46.3189	0.965223	0.978739	0.983594
CM010	10449	3	43	Male	24.2215	III	Sigmoid	Left	Single	255	Drinker	-	62.7667	-	62.7667	-	44.4766	0.970817	0.980763	0.984598
CM011	10443	1	54	Female	19.563	II	Sigmoid	Left	Single	0	Drinker	-	4.6	+	86.0333	-	46.116	0.953322	0.97595	0.982828
CM012	10461	1	46	Male	19.1512	III	Rectum	Left	Single	420	Drinker	-	87.7667	-	87.7667	-	41.6925	0.965011	0.979197	0.984089
CM013	10398	2	63	Male	23.6614	IV	Transverse	Right	Single	0	Non-drinker	-	2.63333	+	28.2667	+	56.7179	0.980131	0.983016	0.985329
CM014	10492	1	63	Male	24.8591	IV	Rectosigmoid	Left	Single	435	Drinker	-	0.833333	+	89.4	-	48.2372	0.975404	0.981694	0.984682
CM015	10505	4	65	Female	17.9931	II	Rectum	Left	Single	460	Non-drinker	-	56.7	-	56.7	-	49.8006	0.978507	0.982029	0.984412
CM016	10503	2	69	Male	25.7276	II	Cecum	Right	Single	1380	Drinker	+	50.3333	+	87.6667	-	45.9484	0.97095	0.980652	0.984374
CM017	10495	1	67	Male	23.8751	II	Rectum	Left	Single	1150	Drinker	-	71.8667	-	71.8667	-	51.5837	0.977432	0.982307	0.985103
CM018	10523	2	50	Male	22.7583	II	Rectum	Left	Single	930	Drinker	+	11.8667	+	22.4667	-	53.3993	0.977953	0.982982	0.98531
CM019	10527	1	62	Male	24.6181	III	Cecum	Right	Single	860	Drinker	-	1.26667	+	85.5	-	50.4084	0.978681	0.982691	0.985279
CM020	10532	2	60	Male	23.2254	III	Sigmoid	Left	Single	260	Non-drinker	-	37.9333	+	86.5333	-	50.749	0.979081	0.982877	0.985342
CM021	10464	Unestimated	76	Male	24.653	II	Rectum	Left	Single	1480	Drinker	-	87.9	-	87.9	-	50.7073	0.976803	0.981688	0.984167
CM022	10514	3	59	Male	24.841	IV	Ascending	Right	Single	800	Drinker	-	4.13333	+	85.6667	-	38.7107	0.954252	0.975074	0.983487
CM023	10566	3	59	Female	22.6562	IV	Sigmoid	Left	Single	250	Non-drinker	-	4.4	+	13.3	+	41.1244	0.962756	0.977546	0.9828
CM024	10556	1	45	Female	23.4224	III	Rectum	Left	Single	0	Drinker	-	62.1333	-	62.1333	-	47.8569	0.974725	0.980542	0.983595
CM025	10542	2	71	Female	31.1111	II	Rectum	Left	Single	700	Non-drinker	-	85.9333	-	85.9333	-	51.6744	0.976707	0.981537	0.984076
CM026	10544	3	48	Male	23.03	III	Rectum	Left	Single	220	Drinker	-	17.9333	+	84.6667	-	47.6654	0.972692	0.981368	0.984888
CM027	10595	3	66	Male	20.5457	II	Rectum	Left	Single	90	Non-drinker	-	62.1333	-	62.1333	-	49.7111	0.976868	0.982354	0.985133
CM028	10603	1	48	Female	22.8928	II	Sigmoid	Left	Single	560	Non-drinker	-	65.3	-	65.3	-	46.1539	0.972267	0.980342	0.983772
CM029	10609	1	51	Male	18.1662	II	Ascending	Right	Single	320	Drinker	-	61.4333	-	61.4333	-	52.3942	0.980444	0.983545	0.985566
CM030	10584	1	51	Male	22.7244	II	Ascending	Right	Single	340	Drinker	-	63.8667	-	62.2333	-	41.1294	0.9663	0.979456	0.984159
CM031	10582	1	70	Male	18.9619	IV	Rectosigmoid	Left	Single	1000	Non-drinker	-	15.1667	+	51.2667	+	54.3013	0.980046	0.983327	0.985417
CM032	10615	Unestimated	75	Female	18.9745	II	Ascending	Right	Single	0	Non-drinker	-	62.1667	-	62.1667	-	48.0525	0.978535	0.982053	0.984182
CM033	10635	3	77	Male	23.3377	III	Ascending	Right	Single	0	Non-drinker	-	61.4667	-	61.4667	-	41.9979	0.968035	0.97965	0.984038
CM034	10645	1	49	Female	19.3821	III	Rectum	Left	Single	450	Non-drinker	-	62.0667	-	62.0667	-	41.591	0.972708	0.980345	0.983615
CM035	10616	1	64	Male	23.1084	III	Rectum	Left	Single	320	Drinker	-	84.8333	-	84.8333	-	44.0628	0.971727	0.981036	0.984606
CM036	10646	1	67	Female	20.1746	III	Rectosigmoid	Left	Single	0	Non-drinker	-	87	-	87	-	52.6033	0.979685	0.982659	0.984674
CM037	10660	2	67	Female	25.4375	III	Rectum	Left	Single	0	Drinker	-	84.4	-	84.4	-	50.123	0.979705	0.982345	0.984246
CM038	10700	4	77	Male	24.6097	II	Transverse	Right	Single	3760	Drinker	-	11.9667	+	74.1667	-	46.7335	0.977137	0.982143	0.984787
CM039	10667	Unestimated	68	Male	24.7676	II	Sigmoid	Left	Single	760	Drinker	-	75.5	-	75.5	-	48.3557	0.972748	0.981136	0.984115
CM040	10656	2	70	Male	24.2424	III	Rectosigmoid	Left	Single	1200	Non-drinker	-	77.5333	-	77.5333	-	47.423	0.975537	0.981416	0.984307
CM041	00001	1	69	Female	22.5069	IV	Rectum	Left	Single	0	Non-drinker	-	11.8667	+	75.7333	-	44.7153	0.975141	0.980986	0.983612
CM042	10675	3	55	Male	26.1752	II	Rectum	Left	Single	500	Drinker	-	63.2667	-	63.2667	-	54.2325	0.979975	0.98267	0.985104
CM043	10755	3	56	Female	20.1348	II	Ascending	Right	Single	370	Non-drinker	-	13.3667	+	29.7333	+	66.0256	0.982014	0.983698	0.985306
CM044	10767	1	72	Male	24.6904	II	Sigmoid	Left	Single	1000	Drinker	-	76.6	-	76.6	-	40.3546	0.958736	0.977249	0.983957
CM045	10812	3	64	Male	23.8367	I	Rectum	Left	Single	750	Drinker	-	76.9667	-	76.9667	-	45.7856	0.973059	0.98076	0.98418
CM046	10775	3	66	Male	18.7109	I	Sigmoid	Left	Single	1530	Drinker	-	62.5333	-	62.5333	-	49.1044	0.976935	0.982427	0.98501
CM047	10813	1	32	Female	22.3478	II	Rectosigmoid	Left	Single	260	Non-drinker	-	74.4	-	74.4	-	47.7921	0.977296	0.981583	0.98403
CM048	10827	2	73	Male	22.913	II	Ascending	Right	Single	1840	Drinker	+	76.7333	-	76.7333	-	38.265	0.953298	0.974724	0.983384
CM049	10822	1	50	Male	26.6749	III	Rectum	Left	Single	480	Drinker	-	31.6667	+	41.5333	-	46.2938	0.97301	0.981481	0.984884
CM050	10829	1	52	Male	26.4236	I	Rectosigmoid	Left	Single	760	Drinker	-	45.6333	+	79	-	60.3059	0.980945	0.983915	0.985779
CM051	10847	4	73	Female	20.5457	III	Ascending	Right	Single	0	Non-drinker	+	76	-	76	-	59.298	0.981317	0.983381	0.985019
CM052	10899	2	72	Male	24.9108	IV	Rectum	Left	Single	1200	Non-drinker	-	15.1	+	82.0333	-	43.4274	0.972679	0.981354	0.98473
CM053	11976	2	47	Male	23.0546	II	Ascending	Right	Single	0	Non-drinker	+	74.4667	-	74.4667	-	55.463	0.979742	0.983816	0.98596
CM054	10333	Unestimated	45	Male	20.6193	II	Rectum	Left	Single	250	Drinker	-	62.5333	-	62.5333	-	48.2615	0.974606	0.982442	0.985381
CM055	10367	1	58	Male	28.0557	III	Rectosigmoid	Left	Single	1025	Non-drinker	-	88.4	-	88.4	-	55.4235	0.981354	0.983479	0.985753
CM056	10381	4	73	Female	16.4366	I	Transverse, Sigmoid and Rectum	Left	Multiple	0	Non-drinker	+	58.3	-	58.3	+	39.1214	0.976174	0.980973	0.983507
CM057	11748	1	54	Male	20.7612	II	Cecum and Rectum	Right	Multiple	300	Drinker	+	90.2333	-	90.2333	-	46.3344	0.972505	0.981789	0.985115
CM058	11074	Unestimated	42	Female	17.9418	II	Rectosigmoid	Left	Single	220	Drinker	-	69.8333	-	69.8333	-	53.689	0.981275	0.98305	0.984767
CM059	11952	Unestimated	46	Male	21.6713	II	Sigmoid	Left	Single	225	Non-drinker	+	61.5667	-	61.5667	-	51.9695	0.977848	0.983432	0.985786
CM060	10709	3	56	Female	23.0112	I	Rectosigmoid	Left	Single	110	Drinker	-	61.1333	-	61.1333	-	51.585	0.980341	0.982476	0.984472
CM061	10348	1	66	Male	27.3356	IV	Ascending	Right	Multiple	0	Non-drinker	-	15.4	+	28.5	+	54.7514	0.978002	0.983512	0.985893
CM062	10715	1	87	Male	23.4236	III	Ascending and Cecum	Right	Multiple	380	Drinker	-	19.6333	-	19.6333	-	69.2187	0.983675	0.985234	0.98681
CM063	10785	4	62	Female	22.0317	0	Ascending	Right	Single	0	Drinker	-	42.0333	-	42.0333	-	47.4634	0.97985	0.98243	0.98443
CM064	10862	2	70	Female	21.7784	IV	Ascending	Right	Single	0	Drinker	-	13.9667	+	26.8333	+	61.54	0.981439	0.982987	0.984639
CM065	10900	4	71	Male	22.3863	II	Sigmoid	Left	Single	0	Non-drinker	-	65.3	-	65.3	-	69.684	0.983674	0.985425	0.987089
CM066	10916	Unestimated	60	Female	26.635	II	Transverse	Right	Single	> 100	Non-drinker	-	25.4	-	25.4	-	52.3501	0.97898	0.982021	0.984145
CM067	10896	3	45	Male	20.7157	III	Rectum	Left	Single	500	Drinker	-	12.1	+	39.5333	+	51.9712	0.980409	0.98351	0.985421
CM068	10882	3	73	Female	19.8178	II	Sigmoid	Left	Single	0	Non-drinker	-	12.1	+	69.1667	+	47.586	0.980423	0.982436	0.984253
CM069	10894	3	61	Female	28.3987	II	Sigmoid	Left	Single	0	Non-drinker	-	83.3	-	83.3	-	42.976	0.97749	0.981564	0.983765
CM070	10931	Unestimated	67	Male	24.6755	III	Descending, Sigmoid and Rectosigmoid	Left	Multiple	1645	Drinker	-	54.1	+	83.2333	-	48.1762	0.975144	0.982203	0.984408
CM071	10914	1	55	Male	25.8166	IV	Descending	Left	Single	600	Drinker	-	10.3333	+	27.5333	+	59.4348	0.982408	0.984556	0.986225
CM072	10932	1	66	Male	22.2753	IV	Ascending	Right	Single	110	Drinker	-	22.2333	+	68.1333	+	53.2079	0.981581	0.983865	0.985672
CM073	10961	3	41	Male	28.3604	III	Rectosigmoid	Left	Single	440	Non-drinker	-	78.3667	-	78.3667	-	63.6574	0.983225	0.984871	0.986451
CM074	10962	1	59	Male	26.8544	III	Sigmoid	Left	Single	540	Drinker	-	61.8	-	61.8	-	46.5056	0.974499	0.982212	0.985058
CM075	10977	1	61	Male	21.2585	II	Sigmoid	Left	Single	860	Non-drinker	-	81.2	-	81.2	-	67.9336	0.981494	0.983727	0.985618
CM076	11827	1	44	Male	22.4913	III	Descending	Left	Single	75	Drinker	+	66.2667	-	66.2667	-	53.6083	0.978341	0.98358	0.985867
CM077	10917	3	72	Male	21.4692	IV	Ascending	Right	Single	980	Drinker	-	30.0667	+	35.0333	+	69.859	0.984107	0.985603	0.987098
CM078	10988	1	65	Female	15.6157	III	Ascending	Right	Single	0	Drinker	-	62.5333	-	62.5333	-	41.9858	0.975606	0.981405	0.983809
CM079	11006	4	75	Male	19.7055	0	Cecum	Right	Single	200	Drinker	-	24.6333	-	24.6333	+	55.7693	0.978635	0.98317	0.98569
CM080	11020	2	53	Male	25.8645	II	Descending	Left	Single	600	Non-drinker	+	74.2333	-	74.2333	-	74.6813	0.984192	0.985464	0.98685
CM081	11053	1	66	Male	25.0399	II	Sigmoid	Left	Single	720	Drinker	-	63.3	-	63.3	-	47.987	0.980742	0.983468	0.985343
CM082	11002	2	67	Male	23.7387	III	Rectosigmoid	Left	Single	360	Drinker	-	78.1333	-	78.1333	-	50.752	0.980907	0.983504	0.985605
CM083	11027	2	73	Female	28.3987	III	Sigmoid	Left	Single	0	Non-drinker	-	80.8	-	80.8	-	62.9628	0.982838	0.984362	0.986004
CM084	11051	2	57	Male	22.546	III	Ascending	Right	Single	0	Drinker	-	74.2667	-	74.2667	-	43.4069	0.957935	0.978867	0.984662
CM085	11104	1	43	Male	21.1389	I	Rectosigmoid	Left	Single	500	Non-drinker	-	61.4333	-	61.4333	-	44.628	0.97034	0.981382	0.985534
CM086	11078	2	65	Male	20.1771	II	Rectum	Left	Single	0	Non-drinker	-	61.6	-	61.6	-	51.3328	0.977365	0.983117	0.985438
CM087	11075	Unestimated	71	Male	19.3337	III	Sigmoid	Left	Single	1020	Drinker	-	3.9	+	32.2	+	49.5704	0.978563	0.983443	0.985654
CM088	11048	1	65	Female	20.3125	0	Cecum	Right	Single	0	Non-drinker	-	13.7	-	13.7	-	48.7175	0.980584	0.98282	0.984631
CM089	11070	1	49	Male	22.2222	III	Ascending	Right	Single	200	Drinker	-	62.3667	-	62.3667	-	41.7179	0.969118	0.98048	0.984282
CM090	11120	1	73	Male	18.1955	II	Sigmoid	Left	Single	1040	Non-drinker	-	7.1	+	66.4667	-	62.3639	0.982976	0.984863	0.986541
CM091	11118	2	65	Male	20.9107	II	Rectosigmoid	Left	Single	0	Non-drinker	-	62.1333	-	62.1333	-	49.0274	0.976839	0.982264	0.985093
CM092	11096	3	49	Male	24.6303	III	Rectum	Left	Single	520	Drinker	-	21.6333	+	37.1667	+	45.7304	0.97343	0.982081	0.985188
CM093	11076	Unestimated	71	Male	24.5089	III	Rectum and Ascending	Left	Multiple	1000	Non-drinker	-	16.2667	+	45.7333	-	48.7455	0.980877	0.983397	0.985501
CM094	11115	1	46	Female	21.7784	II	Descending	Left	Single	540	Drinker	+	76.9333	-	76.9333	-	58.9446	0.98217	0.983693	0.985309
CM095	11202	1	73	Male	21.7079	II	Sigmoid	Left	Single	0	Drinker	-	4.13333	+	78.3	-	40.3277	0.970891	0.980301	0.983542
CM096	11211	1	79	Female	19.5717	I	Cecum	Right	Single	0	Non-drinker	-	49.2667	-	49.2667	-	36.4448	0.96683	0.979073	0.98281
CM097	11175	2	74	Female	25.7778	III	Sigmoid and Rectum	Left	Multiple	0	Non-drinker	-	62.8	-	62.8	-	51.4939	0.980839	0.982762	0.984518
CM098	11217	3	39	Male	24.3375	III	Rectum	Left	Single	0	Non-drinker	-	11.8	+	13.3	-	41.6454	0.966353	0.979565	0.984616
CM099	11179	3	54	Female	20.3619	II	Sigmoid	Left	Single	0	Non-drinker	-	65.5667	-	65.5667	-	44.7513	0.976952	0.981604	0.983873
CM100	11225	1	64	Female	17.6309	II	Rectum	Left	Single	> 100	Drinker	-	6.96667	+	49	+	47.3118	0.980504	0.982365	0.984181
CM101	11250	4	45	Male	23.5294	III	Rectosigmoid	Left	Single	340	Drinker	-	21.8667	+	77.7333	-	59.4095	0.982535	0.984638	0.98632
CM102	11256	1	43	Male	28.0277	II	Rectosigmoid	Left	Single	0	Drinker	-	62.0667	-	62.0667	-	48.8711	0.978762	0.982126	0.984639
CM103	11274	2	62	Female	27.5556	II	Rectosigmoid	Left	Single	0	Non-drinker	-	62.5667	-	62.5667	-	58.8903	0.981902	0.983407	0.984979
CM104	11800	Unestimated	38	Female	21.9076	III	Rectosigmoid	Left	Single	160	Drinker	-	75.3333	-	75.3333	-	43.2825	0.977758	0.981807	0.984091
CM105	11264	1	40	Male	22.0932	I	Rectum	Left	Single	315	Drinker	-	66.2	-	66.2	-	51.2971	0.980475	0.98358	0.98565
CM106	11280	1	67	Male	23.8281	III	Rectum	Left	Single	820	Drinker	-	8.36667	+	75.3333	-	41.8553	0.966183	0.97971	0.984746
CM107	11279	4	62	Male	23.6614	II	Rectum	Left	Single	301	Drinker	-	61.9	-	61.9	-	38.6403	0.972399	0.981385	0.984753
CM108	11309	Unestimated	62	Male	26.8136	II	Sigmoid	Left	Single	380	Drinker	-	62.0333	-	62.0333	-	55.2815	0.977338	0.983705	0.986058
CM109	11314	4	62	Male	22.231	II	Sigmoid	Left	Single	1720	Drinker	-	61.8667	-	61.8667	-	47.739	0.980271	0.983071	0.985337
CM110	11300	1	47	Male	30.4367	II	Sigmoid	Left	Single	560	Non-drinker	-	32.3667	+	48.2333	+	47.3863	0.974165	0.98168	0.984765
CM111	11904	1	44	Male	22.8374	III	Transverse	Right	Single	460	Drinker	+	25.8667	-	25.8667	-	60.6575	0.982348	0.984534	0.986223
CM112	11373	1	69	Male	23.7332	II	Sigmoid	Left	Single	0	Drinker	-	15.3667	+	72.1333	-	51.0956	0.979737	0.983558	0.98557
CM113	11367	2	61	Female	23.5556	I	Rectum	Left	Single	0	Non-drinker	-	66.4667	-	66.4667	-	55.7969	0.981832	0.983496	0.985102
CM114	11381	1	68	Female	32.3939	IV	Sigmoid	Left	Single	0	Non-drinker	-	10.3333	+	74.6667	-	44.3444	0.979553	0.982178	0.984105
CM115	11397	3	51	Female	17.5431	I	Rectosigmoid	Left	Single	320	Drinker	-	73.6667	-	73.6667	-	46.1464	0.979668	0.982144	0.98422
CM116	11422	4	40	Female	18.026	III	Rectosigmoid	Left	Single	300	Non-drinker	-	63.6667	-	63.6667	-	45.5442	0.977257	0.981579	0.983915
CM117	11404	1	56	Male	24.4898	II	Rectum	Left	Single	615	Drinker	-	65.1333	-	65.1333	-	46.4028	0.977958	0.982889	0.985197
CM118	11442	2	37	Male	23.3067	III	Rectum	Left	Single	0	Non-drinker	-	70.9667	-	70.9667	-	48.8687	0.979763	0.983329	0.98545
CM119	11435	1	59	Male	24.093	I	Rectum	Left	Single	1520	Drinker	-	62.8333	-	62.8333	-	42.92	0.978307	0.981917	0.984634
CM120	11426	3	52	Female	24.841	II	Rectum	Left	Single	0	Drinker	-	73.5333	-	73.5333	-	45.0405	0.979341	0.981984	0.984047
CM121	12107	1	45	Male	22.3214	III	Rectosigmoid	Left	Single	250	Drinker	+	63.4333	-	63.4333	-	39.8098	0.959324	0.976683	0.984292
CM122	11483	2	51	Female	17.8506	I	Rectum	Left	Single	0	Drinker	-	63.1667	-	63.1667	-	42.3018	0.968287	0.979903	0.983568
CM123	11539	1	67	Male	24.3911	II	Rectum	Left	Single	0	Drinker	-	7.7	+	64.8667	-	42.3575	0.965909	0.97981	0.98459
CM124	11497	3	44	Female	20.6852	II	Rectosigmoid	Left	Single	0	Non-drinker	-	70.9	-	70.9	-	45.7472	0.974419	0.981123	0.983711
CM125	11479	4	50	Female	21.2084	II	Rectosigmoid	Left	Single	0	Non-drinker	-	65.5667	-	65.5667	-	50.7599	0.980935	0.982853	0.984658
CM126	11564	1	58	Female	23.6407	III	Ascending	Right	Single	150	Drinker	-	64.3	-	64.3	-	60.8246	0.981968	0.983357	0.984913
CM127	11494	1	64	Male	23.8751	II	Rectosigmoid	Left	Single	900	Non-drinker	-	65.6	-	65.6	-	40.0797	0.969074	0.980219	0.984343
CM128	11519	1	51	Female	19.5312	I	Rectosigmoid	Left	Single	240	Drinker	-	64.1	-	64.1	-	46.9341	0.979608	0.982006	0.984118
CM129	11504	1	65	Female	25.6837	I	Sigmoid	Left	Single	0	Non-drinker	-	27.3333	-	27.3333	-	38.8428	0.9704	0.979851	0.983341
CM130	11575	1	65	Male	24.8591	II	Rectum	Left	Single	350	Drinker	-	6.26667	+	23.8333	+	40.8085	0.964132	0.979171	0.984494
CM131	11616	1	71	Male	20.202	I	Rectum	Left	Single	900	Drinker	-	68.5667	-	68.5667	-	43.8832	0.975937	0.981478	0.983998
CM132	11538	3	64	Male	27.1809	III	Sigmoid	Left	Single	1200	Non-drinker	-	15.2	+	69.5667	-	39.2218	0.969699	0.980634	0.984583
CM133	11554	1	65	Male	20.3704	II	Ascending	Right	Single	180	Drinker	-	66	-	66	-	63.8129	0.983345	0.984825	0.986534
CM134	11615	4	22	Male	20.7157	III	Ascending, Transverse and Rectum	Right	Multiple	> 100	Non-drinker	-	67.2	-	67.2	-	44.9	0.978745	0.982366	0.984732
CM135	11583	2	62	Male	27.5482	II	Transverse, Sigmoid and Rectosigmoid	Left	Multiple	800	Drinker	-	45.7	-	45.7	-	60.8549	0.98295	0.984863	0.986511
CM136	11886	1	59	Female	33.4977	III	Rectosigmoid	Left	Single	0	Non-drinker	-	35.9333	+	62.0333	-	60.7806	0.981509	0.983093	0.984767
CM137	11750	1	53	Male	24.7252	II	Rectosigmoid	Left	Single	250	Non-drinker	-	61.3667	+	65.3333	-	44.6356	0.979213	0.98295	0.985243
CM138	12337	3	26	Female	20.3125	IV	Sigmoid	Left	Single	0	Non-drinker	-	7.03333	+	41.7	+	64.2835	0.98212	0.983675	0.985277

## Sheet: Table 2
Extended Data Table 2. Clinical data collected from the healthy controls in this study (n = 146).
Metagenome ID	Group	Age	Sex	Body mass index	Brinkman Index	Alcohol
10037	Healthy	66	F	25.4109	0	Drinker
10048	Healthy	77	F	23.634	0	Non-drinker
10060	Healthy	73	F	20.7031	0	Non-drinker
10080	Healthy	74	M	20.6852	0	Non-drinker
10100	Healthy	70	M	23.6614	400	Drinker
10106	Healthy	72	F	22.3703	0	Non-drinker
10114	Healthy	55	F	23.5556	0	Non-drinker
10158	Healthy	61	M	26.2336	2400	Non-drinker
10169	Healthy	76	M	22.1003	600	Drinker
10188	Healthy	71	F	18.0172	0	Non-drinker
10200	Healthy	49	F	19.6311	0	Drinker
10207	Healthy	73	M	25.8166	960	Drinker
10212	Healthy	70	M	29.271	1000	Drinker
10221	Healthy	70	M	22.0604	0	Drinker
10223	Healthy	66	M	23.6652	1200	Drinker
10246	Healthy	64	F	23.1911	760	Drinker
10250	Healthy	47	M	20.679	0	Drinker
10262	Healthy	45	M	22.2222	0	Non-drinker
10271	Healthy	68	M	22.8374	0	Non-drinker
10302	Healthy	64	M	20.5191	100	Drinker
10304	Healthy	44	M	22.0522	180	Drinker
10315	Healthy	59	F	20.0288	40	Drinker
10320	Healthy	70	M	25.7117	720	Drinker
10325	Healthy	72	M	22.1367	900	Non-drinker
10335	Healthy	75	M	22.3081	390	Non-drinker
10340	Healthy	45	F	19.2277	0	Drinker
10350	Healthy	67	F	26.0417	0	Non-drinker
10353	Healthy	50	F	20.3428	325	Drinker
10356	Healthy	76	M	23.7954	340	Drinker
10362	Healthy	76	M	25.8806	0	Drinker
10463	Healthy	76	F	19.1111	0	Drinker
10486	Healthy	65	F	19.8189	0	Non-drinker
10489	Healthy	78	M	22.8624	20	Non-drinker
10497	Healthy	65	M	21.5645	0	Drinker
10508	Healthy	67	M	21.4536	0	Drinker
10515	Healthy	66	F	22.3478	0	Drinker
10519	Healthy	71	M	22.9421	0	Non-drinker
10537	Healthy	76	F	23.4221	0	Non-drinker
10541	Healthy	53	F	18.662	0	Drinker
10559	Healthy	41	F	20.3244	105	Drinker
10570	Healthy	45	M	23.9512	0	Drinker
10583	Healthy	67	M	25.0995	165	Drinker
10589	Healthy	75	F	22.6667	0	Non-drinker
10592	Healthy	54	M	23.7118	100	Drinker
10632	Healthy	76	M	25.9695	380	Non-drinker
10639	Healthy	40	M	22.9819	100	Drinker
10647	Healthy	76	M	21.7993	720	Drinker
10661	Healthy	49	F	22.3081	0	Drinker
10684	Healthy	61	F	18.591	0	Non-drinker
10698	Healthy	71	M	23.3844	450	Non-drinker
10701	Healthy	42	M	26.1738	216	Drinker
10716	Healthy	49	F	21.2306	280	Drinker
10733	Healthy	63	M	22.0581	600	Non-drinker
10776	Healthy	42	F	25.5937	0	Drinker
10784	Healthy	49	M	27.3982	870	Drinker
10788	Healthy	74	M	22.5896	150	Non-drinker
10797	Healthy	70	F	25.3333	0	Drinker
10802	Healthy	77	M	20.4382	90	Non-drinker
10805	Healthy	54	F	19.6283	0	Non-drinker
10832	Healthy	55	M	24.093	0	Non-drinker
10850	Healthy	51	M	28.3848	450	Drinker
10869	Healthy	69	M	22.4082	0	Non-drinker
10889	Healthy	54	F	20.7756	0	Non-drinker
10890	Healthy	68	F	18.662	0	Drinker
10907	Healthy	37	M	25.0135	140	Drinker
10913	Healthy	46	M	22.4712	0	Drinker
10924	Healthy	46	F	23.0469	520	Non-drinker
10947	Healthy	58	M	20.3037	600	Drinker
10968	Healthy	43	F	16.7969	0	Non-drinker
10976	Healthy	52	M	25.0135	150	Drinker
10990	Healthy	58	F	18.5529	0	Non-drinker
11031	Healthy	66	M	24.8016	0	Drinker
11035	Healthy	73	F	21.6041	380	Drinker
11049	Healthy	61	F	21.0772	0	Drinker
11057	Healthy	71	F	17.3484	0	Non-drinker
11062	Healthy	48	M	21.6721	300	Drinker
11106	Healthy	44	M	23.8367	200	Drinker
11124	Healthy	77	M	20.5714	195	Drinker
11159	Healthy	63	F	27.5482	840	Drinker
11170	Healthy	32	M	18.7328	0	Drinker
11210	Healthy	68	F	19.2234	0	Non-drinker
11213	Healthy	51	M	19.1571	50	Drinker
11223	Healthy	63	M	21.1073	525	Drinker
11226	Healthy	51	F	19.433	0	Drinker
11227	Healthy	72	M	23.0546	1440	Drinker
11243	Healthy	40	M	27.3797	480	Non-drinker
11255	Healthy	47	M	26.1752	0	Drinker
11294	Healthy	57	M	26.2596	680	Drinker
11299	Healthy	54	M	23.5294	170	Drinker
11343	Healthy	44	F	21.6311	0	Drinker
11354	Healthy	55	M	24.5089	1700	Drinker
11369	Healthy	55	M	21.2585	245	Drinker
11379	Healthy	79	F	24.6094	0	Drinker
11389	Healthy	38	M	22.4996	0	Non-drinker
11409	Healthy	54	F	20.2395	0	Non-drinker
11413	Healthy	61	M	26.4236	800	Non-drinker
11431	Healthy	58	F	17.9089	0	Non-drinker
11448	Healthy	40	F	17.6309	0	Non-drinker
11449	Healthy	46	F	20.3125	0	Drinker
11450	Healthy	72	M	22.9481	900	Non-drinker
11451	Healthy	62	F	21.9261	0	Non-drinker
11452	Healthy	47	M	21.4533	360	Drinker
11454	Healthy	47	F	18.4425	0	Drinker
11464	Healthy	56	M	23.8367	0	Drinker
11473	Healthy	54	M	27.3356	780	Drinker
11475	Healthy	63	F	19.1467	0	Non-drinker
11526	Healthy	52	F	22.5827	0	Non-drinker
11527	Healthy	35	F	22.1893	0	Drinker
11580	Healthy	21	F	17.898	0	Non-drinker
11607	Healthy	70	F	29.9643	0	Non-drinker
11626	Healthy	50	M	21.4619	50	Drinker
11638	Healthy	57	F	21.4844	40	Drinker
11641	Healthy	52	M	27.6361	810	Non-drinker
11675	Healthy	51	F	21.9076	0	Non-drinker
11682	Healthy	61	F	17.0874	0	Non-drinker
11694	Healthy	63	F	17.898	0	Non-drinker
11710	Healthy	40	M	22.7732	0	Drinker
11720	Healthy	70	M	17.9688	300	Non-drinker
11754	Healthy	27	M	24.968	0	Drinker
11788	Healthy	34	M	21.9281	0	Drinker
11796	Healthy	75	F	30.2112	0	Non-drinker
11818	Healthy	37	M	22.1297	0	Non-drinker
11822	Healthy	55	F	21.0828	336	Non-drinker
11873	Healthy	78	M	23.3091	600	Drinker
11885	Healthy	73	M	22.8928	0	Drinker
11927	Healthy	58	M	22.2291	120	Non-drinker
11942	Healthy	76	F	21.5019	200	Drinker
11955	Healthy	70	M	22.68	20	Non-drinker
11965	Healthy	41	F	26.079	0	Non-drinker
11984	Healthy	62	M	21.7079	80	Drinker
11996	Healthy	51	F	21.2306	0	Drinker
12016	Healthy	60	F	18.5901	0	Non-drinker
12070	Healthy	49	F	20.83	0	Drinker
12082	Healthy	30	M	unknown	unknown	unknown
12101	Healthy	56	M	24.093	0	Drinker
12106	Healthy	77	F	21.9261	0	Non-drinker
12165	Healthy	64	F	21.0938	0	Drinker
12197	Healthy	43	M	24.7409	0	Drinker
12204	Healthy	55	F	19.7777	460	Non-drinker
12242	Healthy	33	F	22.2063	0	Drinker
12243	Healthy	74	F	19.91	0	Non-drinker
12276	Healthy	46	M	21.7994	0	Drinker
12340	Healthy	59	M	26.5338	0	Drinker
12370	Healthy	65	F	18.2563	0	Non-drinker
12389	Healthy	35	M	24.2215	220	Drinker
12396	Healthy	38	F	17.8506	80	Non-drinker

## Sheet: Table 3
Extended Data Table 3. Comparative assessment of clinical backgrounds in colorectal cancer patients and healthy individuals.
	CRC patients	Healthy subjects	P value*
	n = 138	n = 146
Age (years)
< 50	33	42	0.4193
≥ 50	105	104
Sex
Female	51	67	0.1485
Male	87	79
Body mass index
< 25	110	118	0.765
≥ 25	28	27
Unknown	0	1
Brinkman Index
< 100	50	90	1.729e-05
≥ 100	88	55
Unknown	0	1
Alcohol
Non-drinker	59	61	1
Drinker	79	84
Unknown	0	1
*; Fisher’s exact test was performed between CRC patients and healthy subjects.
CRC, colorectal cancer

## Sheet: Table 4
Extended Data Table 4. Clinical features compared across colorectal cancer subtypes based on gut microbiota.
	Subtype 1	P value*	Subtype 2	P value*	Subtype 3	P value*	Subtype 4	P value*
	n = 61		n = 23		n = 27		n = 14
Age, years
Median	61	0.3034**	65	0.0344**	55	0.0285**	62	0.2791**
Range (lower, upper)	32, 87		37, 74		26, 77		22, 77
< 50	15	0.8327	2	0.0533	9	0.126	3	1
≥ 50	46		21		18		11
Sex
Female	20	0.3813	8	1	11	0.6622	7	0.3818
Male	41		15		16		7
Body mass index
Median	22.8	0.4675**	23.7	0.0195**	23.3	0.3829**	21.3	0.00556**
Range (lower, upper)	15.6, 33.5		17.9, 31.1		17.5, 28.4		16.4, 24.6
< 25	48	1	15	0.0877	22	1	14	0.0406
≥ 25	13		8		5		0
Brinkman Index
Median	320	0.1869**	0	0.1759**	250	0.3374**	200	0.1946**
Range (lower, upper)	0, 1520		0, 1840		0, 1530		0, 3760
< 100	18	0.0654	13	0.0335	11	0.8251	6	0.7745
≥ 100	43		10		16		8
Alcohol
Non-drinker	20	0.0392	14	0.0663	13	0.6618	7	0.7757
Drinker	41		9		14		7
Stage
0	1	0.4234	0	0.3336	0	0.1166	2	0.1286
I	8		2		4		1
II	24		10		8		6
III	21		8		9		4
IV	7		3		6		1
0 / I / II	33	0.8583	12	1	12	0.3866	9	0.4074
III / IV	28		11		15		5
Location of primary CRC
Right side	16	1	6	1	4	0.213	6	0.1892
Left side	45		17		23		8
Multiple lesions
Multiple	3	1	2	0.6116	0	0.3447	2	0.1765
Single	58		21		27		12
Hypermutated phenotype
Hypermutated CRC	5	0.7637	5	0.0443	0	0.0677	2	0.6239
Non-hypermutated CRC	56		18		27		12
*; Fisher’s exact test was performed between the CRC patients belonging to one subtype and others.
**; Wilcoxon rank sum test (one-sided) was performed between the CRC patients belonging to one subtype and others.
CRC, colorectal cancer

## Sheet: Table 5
Extended Data Table 5. Age distribution of different colorectal cancer subtypes based on gut microbiota.
	n	Minimum (years)	First quartile (years)	Median (years)	Mean (years)	Third quartile (years)	Maximum (years)
Subtype 1	61	32	50	61	58.9	67	87
Subtype 2	23	37	58.5	65	62.57	70	74
Subtype 3	27	26	46.5	55	54.59	64	77
Subtype 4	14	22	51.5	62	59.5	72.5	77

## Sheet: Table 6
Extended Data Table 6. Correlation between the CMS* based on ColoType** and the clinical information.
Multivariate analysis
Variables: age, gender, stage, location of CRC, Brinkman index, SHAP# cluster, and multiple CRC lesions
CMS	Category	Clinical information	Pr (>|t|)
nearest CMS1	SHAP cluster	Subtype 2	0.0141
nearest CMS1	SHAP cluster	Subtype 4	0.0485
nearest CMS1	Right- or Left-sided CRC	Right-sided CRC	0.008
nearest CMS2	Brinkman Index	High	0.0188
nearest CMS2	SHAP cluster	Not Subtype 2	0.0138
nearest CMS2	SHAP cluster	Not Subtype 4	0.0138
nearest CMS2	Gender	Female	0.000859
nearest CMS3	Multiple or Single	Multiple CRC lesions	0.00217
nearest CMS4	Brinkman Index	Low	0.0154
Univariate analysis
Variable: SHAP cluster
CMS	Category	Clinical information	Pr (>|t|)
nearest CMS1	SHAP cluster	Subtype 2	0.0207
* CMS; consensus molecular subtype
** ColoType: a forty gene signature for consensus molecular subtyping of colorectal cancer tumors using whole‑genome assay or targeted RNA‑sequencing. Buechler SA et.al. Scientific Reports 2020 (10):12123. https://doi.org/10.1038/s41598-020-69083-y
# SHAP; SHapley Additive exPlanations

## Sheet: Table 7
Extebded Data Table 7. Correlation between colibactin signatures and gut microbiota subtypes.
All cases
Subtype	Signature	Aetiology	P value	Median of subtype	Median of others	Median of subtype / Median of others
1	ID1	Slippage during DNA replication	0.0487	0.456	0.388	1.18
2	SBS44	Defective DNA mismatch repair	0.0129	0.032	0.007	4.53
2	ID2	Defective DNA mismatch repair	0.0466	0.401	0.33	1.22
3	Novel1	Similar to SBS9 (polymerase eta)	0.0025	0.129	0.053	2.41
3	Average of SBS88 and ID18	Colibactin	0.0219	0.109	0.062	1.76
3	ID18	Colibactin	0.0223	0.151	0.1	1.51
Non-hypermutated cases
Subtype	Signature	Aetiology	P value	Median of subtype	Median of others	Median of subtype / Median of others
1	ID1	Slippage during DNA replication	0.037	0.5088	0.4142	1.2285
2	SBS5	Unknown (clock-like signature)	0.0104	0.1081	0.0608	1.7779
3	Novel1	Similar to SBS9 (polymerase eta)	0.0439	0.144	0.0792	1.8194
ID, Small insertions and deletions
SBS, Single base substitutions

## Sheet: Table 8
Extended Data Table 8. Correlation between mutational signatures and hypermutated cases.
Subtype	Signature	Aetiology	P value	Median of subtype	Median of others	Median of subtype / Median of others	# samples of subtype	# samples of others
Hypermutated	SBS44	Defective DNA mismatch repair	4.98e-09	0.3823	0.0077	49.554	12	126
Hypermutated	ID2	Defective DNA mismatch repair	1.59e-08	0.9851	0.3284	3	12	126
Hypermutated	ID14	Unknown	1.76e-08	0	0.0363	0	12	126
Hypermutated	ID1	Slippage during DNA replication	5.54e-08	0.0131	0.4261	0.031	12	126
Hypermutated	ID18	Colibactin	8.31e-08	0	0.1216	0	12	126
Hypermutated	Average of SBS88 and ID18	Colibactin	1.91e-07	0	0.0776	0	12	126
Hypermutated	SBS15	Defective DNA mismatch repair	9.35e-07	0.1623	0.0202	8.042	12	126
Hypermutated	SBS18	Reactive oxygen species	4.88e-06	0	0.0841	0	12	126
Hypermutated	SBS93	Unknown	1.78e-05	0	0.0321	0	12	126
Hypermutated	SBS39	Unknown	2.56e-05	0	0.0502	0	12	126
Hypermutated	SBS26	Defective DNA mismatch repair	4.12e-05	0.1924	0.0366	5.254	12	126
Hypermutated	SBS94	Unknown	4.35e-05	0	0.029	0	12	126
Hypermutated	Novel1	Similar to SBS9 (polymerase eta)	0.0002	0	0.0869	0	12	126
Hypermutated	Novel2	Similar to SBS40b (unknown)	0.00032	0	0.0596	0	12	126
Hypermutated	SBS90	Duocarmycin	0.00062	0	0.0187	0	12	126
Hypermutated	SBS8	Unknown	0.00416	0	0.054	0	12	126
Hypermutated	SBS88	Colibactin	0.0073	0	0.0354	0	12	126
Hypermutated	SBS1	Spontaneous deamination of 5-methylcytosine (clock-like signature)	0.02981	0.1642	0.2371	0.693	12	126
ID: Small insertions and deletions						Increase
SBS: Single base substitutions						Decrease

## Sheet: Table 9
Extended Data Table 9. Correlation between mutational signatures and age.
All cases
Age group	Signature	Aetiology	P value	Median of subgroup	Median of others	Median of subgroup / Median of others	Number of samples of subgroup	Number of samples of others
Age ≤ 60	ID1	Slippage during DNA replication	0.0002174	0.375723	0.471313	0.797183	62	70
Age ≤ 50	SBS1	Spontaneous deamination of 5-methylcytosine (clock-like signature)	0.0003583	0.174179	0.256481	0.679111	36	102
Age ≤ 40	ID18	Colibactin	0.003326	0.252187	0.102493	2.46053	9	123
Age ≤ 40	SBS39	Unknown	0.01262	0.0872727	0.0427606	2.04096	9	129
Age ≤ 40	SBS90	Duocarmycin exposure	0.0138	0.0306693	0.0140838	2.17763	9	129
Age ≤ 50	SBS18	Reactive oxygen species	0.03469	0.0542636	0.0823466	0.658965	36	102
Age ≤ 70	SBS93	Unknown	0.04788	0.0293211	0.0195149	1.5025	112	26
Non-hypermutated cases
Age group	Signature	Aetiology	P value	Median of subgroup	Median of others	Median of subgroup / Median of others	Number of samples of subgroup	Number of samples of others
Age ≤ 50	SBS1	Spontaneous deamination of 5-methylcytosine (clock-like signature)	0.0002056	0.183853	0.278597	0.659926	29	94
Age ≤ 60	ID1	Slippage during DNA replication	0.001038	0.404903	0.504167	0.803113	52	65
Age ≤ 60	SBS13	APOBEC	0.006281	0.0539618	0.0257795	2.09321	55	68
Age ≤ 70	SBS93	Unknown	0.01052	0.0366237	0.0109954	3.33082	100	23
Age ≤ 40	ID18	Colibactin	0.01534	0.216263	0.0809891	2.67027	9	108
ID, Small insertions and deletions						Increase
SBS, Single base substitutions						Decrease

## Sheet: Table 10
Extended Data Table 10. Correlation between mutational signatures and tumor location.
All cases
Location of primary tumor	Signature	Aetiology	P value	Median of subgroup	Median of others	Median of subgroup / Median of others	Number of samples of subgroup	Number of samples of others
Left	ID2	Defective DNA mismatch repair	5.08e-05	0.309	0.449	0.689	104	34
Left	ID18	Colibactin	0.00447	0.126	0.077	1.634	104	34
Left	SBS90	Duocarmycin	0.00885	0.021	0.002	11.352	104	34
Left	SBS18	Reactive oxygen species	0.01641	0.071	0.096	0.736	104	34
Left	SBS15	Defective DNA mismatch repair	0.01937	0.019	0.037	0.528	104	34
Left	SBS88	Colibactin	0.03772	0.036	0.02	1.802	104	34
Left	ID14	Unknown	0.04176	0.036	0.024	1.513	104	34
Non-hypermutated cases
Location of primary tumor	Signature	Aetiology	P value	Median of subgroup	Median of others	Median of subgroup / Median of others	Number of samples of subgroup	Number of samples of others
Left	ID2	Defective DNA mismatch repair	0.00046	0.307	0.431	0.713	95	28
Left	ID18	Colibactin	0.00182	0.104	0.05	2.073	95	28
Left	SBS18	Reactive oxygen species	0.00207	0.065	0.099	0.656	95	28
ID, Small insertions and deletions						Increase
SBS, Single base substitutions						Decrease

[truncated: 19 more sheets: Table 11, Table 12, Table 13, Table14, Table 15, Table 16, Table 17, Table 18, Table 19, Table 20, Table 21, Table 22, Table 23, Table 24, Table 25, Table 26, Table 27, Table 28, Table 29]
