# Supplementary material for: Microbiome spectra and prevalent colibactin-associated mutational process in Japanese colorectal cancer
Source: Research Square preprint supplement (doi:10.21203/rs.3.rs-4967540/v1), 2024-09-02
Supplement: Supplementary file 2 [file 5e634ad6bf82e721b00126a9.docx]

**METHODS**

**Patients and samples**

This study was approved by the Research Ethics Committees of the National Cancer Center, Osaka University and Tokyo Institute of Technology as meeting the **ethical guidelines for medical and health research involving human individuals** (National Cancer Center, 2013-244; Osaka University, 20064-2: Tokyo Institute of Technology, 2014018).

A total of 138 colorectal cancer (CRC) patients and 146 healthy controls (HCs) diagnosed at the National Cancer Center Hospital in Tokyo, Japan between 2014 and 2017, for whom all necessary specimens, such as stool specimens, tumor tissue, and compatible normal DNA, were available for analysis, were included in this observational cohort study. The study excluded patients with hereditary disease, such as familial adenomatous polyposis or hereditary non-polyposis colorectal cancer, or inflammatory bowel disease. Genomic data were collected for 138 patients and metagenomic data for 134 patients (sequencing of four stool samples was not possible due to insufficient quantity and poor quality of DNA). Comprehensive questionnaires (475 items, 25 pages) were utilized to collect data on individual daily lifestyle, including dietary habits. These questionnaires were modeled on the Japan Public Health Center-based Prospective Study for the Next Generation (JPHC-NEXT)1.

The individuals classified as healthy were those who had presented with positive fecal occult blood during their hospital visit and subsequently underwent colonoscopy for secondary screening, with no noteworthy results. The first stool acquired at the hospital on the day of colonoscopy was collected for sampling2,3. Stool samples were immediately frozen on dry ice and subsequently stored in a deep freezer at -80°C until processed for DNA extraction. The enrollees were required to consume a low-residue diet the day before the examination. All participants were administered a bowel cleanser and subsequently underwent a colonoscopy examination.

Tumor tissue was procured from surgical specimens collected from patients with CRC. Non-tumor or normal nucleic acids were extracted from blood samples.

**Whole genome shotgun sequencing of fecal samples**

DNA was extracted from frozen stool samples using the bead-beating method4 with a GNOME DNA Isolation Kit (MP Biomedicals). DNA quality was assessed with an Agilent 4200 TapeStation (Agilent Technologies). After final precipitation, the DNA samples were resuspended in TE buffer and stored at −80 ℃ until further analysis. Sequencing libraries were generated from the fecal DNA samples using a Nextera XT DNA Sample Prep Kit (Illumina), and subjected to whole-genome shotgun sequencing on the NovaSeq 6000 platform (Illumina). All samples were paired-end (PE) sequenced with a 150-bp read length to achieve a targeted data size of 5.0 Gb.

**Metagenome sequencing quality control**

A total of 6,399,483,404 (47,757,338 on average) (Discovery cohort); 10,156,584,408 (51,038,112 on average) (Validation cohort) PE reads of 150 bp in length underwent quality control as follows. Raw reads containing the letter ‘N’ (base pair not identified) were discarded. Reads containing bacteriophage *phiX* DNA sequences were identified by mapping them against the reads using Bowtie 2 (version 2.2.9) with preset options in ‘–fast-local’ and were subsequently discarded. The reads were trimmed for adapter and primer sequences using cutadapt (version 1.9.1). The following options were used: '-a CTGTCTCTTATACACATCTCCGAGCCCACGAGAC -O 33 -q 17' for the forward primer sequence and '-a CTGTCTCTTATACACATCTGACGCTGCCGACGA -O 32 -q 17' for the reverse primer sequence. Within the cutadapt program, reads with consecutive quality values of 17 or less were tail-cut at the 3′ termini. Finally, reads less than 50 bp in length were discarded. Reads with average quality scores of 25 or less were excluded. Subsequently, reads were aligned to the human genome (24 gi numbers: from 568336000 to 568336023, GRCh38) using Bowtie2 (version 2.2.9). Those that aligned to the human genome were removed. Finally, unpaired reads were also excluded. A total of 5,550,089,750 (41,418,580 on average) ((Discovery cohort); 8,896,915,982 (44,708,121 on average) (Validation cohort) PE reads in total (hereafter referred to as the ‘high-quality reads’) were used for the following analyses.

**Taxonomic profiling**

High-quality reads were subjected to taxonomic profiling using four pipelines.

Metagenomic OTU (mOTU) profiles were generated at the species and genus levels using mOTU profiler (v.2.6.1)5 with the parameter “-q -k mOTU” for relative abundance and “-q -c -k mOTU” for absolute abundance. MetaPhlAn3 was run with default parameters to construct MetaPhlAn3 profiles at species and genus levels6. Taxonomic assignment was conducted with Kraken 2 using the NCBI RefSeq database (as of May 2021)7, followed by abundance estimation with Bracken at species and genus levels with a read length of 150 bp as a parameter. The fourth profiling was conducted using our in-house pipeline, where the high-quality reads were aligned against The All-Species Living Tree Project (LTP) of the SILVA database (version 123)8 using blastn (cut-offs: E-value < 10-7, sequence identity > 97%, alignment coverage > 80%, bit score > 70). For details of our in-house pipeline, see our previous report5.

**Identification of CRC subtypes based on Shapley additive explanations (SHAP) values**

**1. Creating a CRC classifier using random forest.**

Initially, we utilized the *curatedMetagenomicData* R package9 to train a random forest model on four separate cohorts10,11,12,13. The established filtering thresholds are 10-7 for abundance and 0.95 for prevalence. The random forest model underwent training using the scikit-learn library on the training data and was assessed through 10-fold cross-validation. Model performance was evaluated using Area under the Receiver Operating Characteristics curve (AUC) values. The cross-validation yielded an AUC of 0.84. Subsequently, the trained model was evaluated using the MetaPhlAn3 species relative abundance profiles obtained from the current cohort of 134 CRC samples (Discovery cohort) and 146 healthy samples from our previously published work14. The aim was to estimate the likelihood of having CRC. The model achieved a performance level of 0.71 for the AUC metric.

**2. Shapley Additive Explanations (SHAP) analysis**

SHAP is an explainable AI technique used to predict and explain the output of a machine learning model. It is based on the concept of Shapley values from game theory, which determine how payouts can be distributed fairly among players in a coalition. SHAP applies this concept to explain a machine learning prediction by estimating the contribution of each feature to the prediction. We used the SHAP framework to explain a machine learning prediction by estimating the contribution of each feature to the prediction for each individual. Details of this framework, including the SHAP value calculation, are described in our previous report15. SHAP values were determined by applying the CRC probability, which was derived from the aforementioned random forest model. The calculations of SHAP values and the subsequent analyses, such as principal component analysis (PCA) and *K*-means clustering, were performed using the shapmat Python package available at <https://github.com/ryzary/shapmat>. For this analysis, we selected the SHAP values of the patients with CRC who were correctly predicted. We then performed PCA to obtain the first two principal components (PC1 and PC2) of these SHAP values and finally clustered the results using *K*-means. The framework was used on 199 samples (Validation cohort) to confirm the reproducibility of the SHAP analysis.

**Statistical analyses and reproducibility**

To analyze the dominant bacteria in each cluster, we applied the Kruskal-Wallis H test to the relative abundance data across CRC clusters in each dataset. Subsequently, we conducted the Mann-Whitney *U* test to compare each CRC cluster with the healthy samples to investigate if the bacterial features could be potential CRC biomarkers. A *P*-value threshold of 0.05 was used for both tests.

No sample size calculation was conducted as the present study was non-interventional and observational. Randomization and blinding were not applicable in these observational studies. We excluded samples that did not pass quality control. The exclusion criteria are reported elsewhere in this paper.

**Whole-genome sequencing (WGS) analysis of CRC**

Genomic DNA was extracted from the tumor and matched peripheral bloods. WGS libraries with an insert size of 550 bp were prepared from 2 µg of genomic DNA using a TruSeq DNA PCR-free kit (Illumina). The libraries were sequenced on a NovaSeq 6000 sequencer (Illumina), using 150 bp paired-end reads.

**Mutation calling**

The paired reads were aligned to the human reference genome (GRCh37) using BWA-MEM16 PCR duplications were eliminated when paired reads were mapped to the identical genomic position. Then, pileup files were generated using SAMtools17.

To find somatic point mutations, including single nucleotide variations (SNVs) and short indels, the following base selection cutoffs were used: (1) a mapping quality score of at least 20; (2) a base quality score of at least 10. Next, the selection of somatic mutations involved the application of the following two filtering conditions: (3) in each tumor sample, a mutation is supported by a minimum of 4 reads or 8 reads if TVAF was ≥ 0.15 or 0.15 > TVAF ≥ 0.05, respectively, and at least one of the base quality scores of these reads exceeds 30; (4) the VAF of the matched non-tumor sample is below 0.03, accompanied by a read depth of at least 8. In order to minimize sequence context-dependent errors, the sequence reads of non-tumor samples were grouped and utilized to distinguish true positives from false positives. The VAF of grouped non-tumor samples (NVAF) was computed for each mutated genomic position with a sequence depth of 10 or higher and a VAF below 0.2. Subsequently, the following filters were applied: (5) NVAF is less than 0.03 or 0.01 if TVAF is ≥ 0.15 or between 0.15 and 0.05, respectively; (6) at each mutated genomic position, the ratio of TVAF to NVAF is equal to or greater than 20. To remove SNPs, the following condition was applied: (7) the proportion of non-tumor samples with a VAF equal to or greater than 0.1 is less than 0.002. (8) Finally, any mutation exhibiting a strand bias (between forward and reverse reads) greater than 95% was eliminated.

**Copy number analysis**

Battenberg (ver2.2.10)18 was used to determine the initial copy number ratio, purity, and ploidy using the default parameters. The copy number ratio was modified based on the tumor purity of each sample. The calculation formula employed was as follows: R’ (x) = 1 - (1-R(x))/tumor purity, where R’ (x) represents the adjusted copy number ratio at probe x, while R(x) is the ratio of tumor read depth to non-tumor read depth. Gene amplification was defined as a copy number ratio ≥ 3. Gene deletion was defined as a copy number ratio ≤ 0.75. Cases having a purity < 0.22 were filtered.

**Significant mutated genes (SMGs) analysis**

We evaluated SMGs using three tests (aggregated mutation method, activation bias method, and inactivation bias method19). We calculated the geometric mean of the individual significance tests to obtain the combined *P*-values and then performed multiple testing adjustments to obtain *q*-values. SMGs were further evaluated using dndscv20.

Somatic substitutions and short indels were considered in the evaluation of SMGs in the aggregated mutation method. We estimated the expected numbers of somatic substitutions and short indels in each gene, taking into account each background change rate. These estimates were subsequently incorporated into the total expected number. Tests of significance were conducted based on the assumption of a Poisson distribution (*P*-value).

The number of samples with inactivating alterations (nonsense, read-through, splice-site, and frameshift mutations) was compared with the number of samples with alternative alterations using the Fisher exact test. Conversely, the number of activating alterations (hotspot missense mutations) was compared to the number of other alterations using the Fisher exact test. If there were at least two identical mutations at the same genomic location, that location was considered as a hotspot. If two or more identical mutations were found within a 5 bp range of the hotspot, they were all considered to be hotspot mutations. Missense mutations in hotspots usually have activating functions, but occasionally have inactivating or unidentified functions. Therefore, if the *P* value obtained using the inactivation bias method was less than 0.05, the gene was classified as a tumor suppressor gene, and the *P* value obtained by the activation bias method was fixed at 1. Finally, SMGs were determined if one of the q-values in these three tests and dndscv was less than 0.2.

**Mutational signature analysis**

We analyzed de novo mutational signatures using SigProfilerExtractor21 Significant differences in the contributions of the mutational signatures were computed using Wilcoxon rank-sum tests.

**Clonal analysis of mutational signature**

We classified mutations into clonal [early], clonal [late], clonal [NA], and subclonal using MutationTimeR (ver1.00.2)22. If the mutations occurred before the copy number gain, they were annotated as clonal [early]. If the mutations occurred later, they were annotated as clonal [late], and if the timing was unknown they were annotated as clonal [NA]. We ran R packages deconstructSigs(ver1.9.0)23 for each group of classified mutations. The ‘signature.cutoff’ for deconstructSigs was set to 0 and the ‘signatures.ref’ was set to the SBS/ID signatures outputted by SigProfilerExtractor as described above. We defined clonal [early], clonal [late], and clonal [NA] as clonal mutations. Patients with fewer than 50 mutations in each group were excluded from the analysis.

**Whole transcriptome sequencing (RNA-seq)**

Total RNA was extracted from fresh frozen tumor tissues using the miRNeasy mini kit (Qiagen). RNA quality was measured using a BioAnalyzer (Agilent Technologies), and the samples with an RNA quality score (RIN) greater than 6.0 were subjected to RNA-seq. The RNA-seq library was prepared with the SureSelect Strand-specific RNA Library Prep (Agilent Technologies) using 300 ng total RNA. Sequencing was performed on a HiSeq 2500 (Illumina) with 101 bp paired reads. To calculate gene expression, RNA-seq reads were mapped to the GRCh37/hg19 human genome reference using STAR24 and the mapped read was counted for each gene of the UCSC human transcriptome reference using HTSeq25. Finally, fragments per kilobase of exon per million fragments mapped (FPKM) values were estimated for each UCSC gene, taking into account strand-specific information. Differential gene expression was evaluated using the Wilcoxon-Mann-Whitney test.

**Estimation of non-human bacterial reads in tumor tissues**

We utilized the kneaddata tool (version 0.12.0)26 to eliminate human reads from human rRNA-depleted total RNA sequencing data of tumor tissues, encompassing human and bacterial transcripts. Relative abundance of bacterial reads was calculated as the ratio of non-human reads to all reads in each sample. The total RNA was extracted from fresh-frozen tumor tissues using the miRNAeasy kit (Qiagen). A total of 250 ng of total RNA was used to generate libraries for total RNA sequencing. The Universal Plus Total RNA-seq kit with human rRNA depletion (Tecan) was employed for library preparation, followed by sequencing on a NovaSeq 6000 in PE 150 base mode.

**Decomposition of tumor immune environments**

The gene expression data analyzed using gencode v43lift37 annotation was decomposed into immune environments. CIBERSORTx was used to estimate the proportions of 22 immune cell types from the LM22 dataset, including naïve B cells, memory B cells, plasma cells, CD8 T cells, naïve CD4 T cells, resting memory CD4 T cells, activated memory CD4 T cells, and follicular helper T cells. Cell types analyzed included T cells regulatory (Tregs), gamma delta T cells, resting natural killer (NK) cells, activated NK cells, monocytes, M0 macrophages, M1 macrophages, M2 macrophages, resting dendritic cells, activated dendritic cells, resting mast cells, activated mast cells, eosinophils, and neutrophils. CIBERSORTx was run in “B-mode,” and the “disable quantile normalization” option was selected based on the developer’s recommendation for processing RNA-seq data. Cases were only included in the analysis if they had a CIBERSORTx *P* value < 0.05 using CIBERSORTx profiles.

**Analysis of the T cell-inflamed gene expression profile (GEP)**

We calculated the GEP score27 as the sum of the expression of the 18 genes multiplied by the following coefficients: *CCL5* = 0.008346, *CD27* = 0.072293, *CD274* = 0.042853, *CD276* = -0.0239, *CD8A* = 0.031021, *CMKLR1* = 0.151253, *CXCL9* = 0.074135, *CXCR6* = 0.004313, *HLA.DQA1* = 0.020091, *HLA.DRB1* = 0.058806, *HLA.E* = 0.07175, *IDO1* = 0.060679, *LAG3* = 0.123895, *NKG7* = 0.075524, *PDCD1LG2* = 0.003734, *PSMB10* = 0.032999, *STAT1* = 0.250229, and *TIGIT* = 0.084767.

**Measurement of *clbP* by qPCR**

Quantification of the *clbP* gene (copies/mL) on genomic DNA from tumor tissues or fecal samples was conducted by Adenoprevent Co., Ltd. in Nagoya, Japan28. qPCR was performed using the KAPA SYBR Fast qPCR Kit (Roche Molecular Systems) and the Thermal Cycler Dice® Real Time System (TAKARA BIO). The *clbP* gene was quantified as copies/mL based on Ct values using a calibration curve derived from a *clbP* gene standards (Adenoprevent Co., Ltd.)29,30

**Timing analysis of copy number (CN) gains**

The relative timing of three specific types of copy number gains was determined: 1, copy number neutral loss of heterozygosity (CNN-LOH)/loss + gain (N:0); 2, mono-allelic gains (N:1); 3, bi-allelic gains (N:M) by MutationTimeR (ver1.00.2)22 utilizing somatic mutations and copy number variations obtained from WGS data. The timing of CNN-LOH/loss + gain, mono-allelic gains, and bi-allelic gains in each case were determined as follows: our selection process solely involved choosing segments with mutations of 100 or more, guaranteeing the extraction of dependable timings. Subsequently, we computed the weighted averages of the number of mutations for each of the three types. The comparative analysis of the 4 subtypes excluded hypermutated patients. **Subsequently, we analyze the temporal sequence of events within individual tumors using PhylogicNDT SinglePatientTiming (ver1.0) (**<https://doi.org/10.1101/508127>). We converted the relative timing, ranging from 0 (the time of fertilized egg) to 1 (the time of diagnosis). We calculated the actual event timing by multiplying the relative timing with the age of diagnosis. Note: The estimation could be delayed compared to the actual event timing if the mutation rate was not constant, that is, when the mutation rate was accelerated, as discussed elsewhere22.

**Immunohistochemistry**

Deparaffinized 4 μm thick sections from each paraffin block were exposed to 3% hydrogen peroxide for 15 minutes to block endogenous peroxidase activity. Antigen retrieval was performed by using an autoclave in a 10 mM citrate buffer (pH 6.0) for 10 minutes. The slides were incubated with anti-FOXP3 mouse monoclonal antibody (236A/E7, dilution 1:100, ab20034, Abcam) for 1 hour at room temperature and subsequently labeled using the EnVision system (Dako) with mouse linker (Dako) according to the vendor’s protocol. Chem-Mate EnVision (Dako) methods were used for detection.

**Accession numbers**

The accession numbers for the raw sequencing data reported in this paper have been deposited in the National Bioscience Database Center, Tokyo, Japan: PRJDB18241 (PSUB022599), PRJDB18242 (PSUB022668), JGAS000696, and JGAD000829.

**REFERENCES**

1 Tsugane, S. & Sawada, N. The JPHC study: design and some findings on the typical Japanese diet. *Jpn J Clin Oncol* **44**, 777-782, doi:10.1093/jjco/hyu096 (2014).

2 Nishimoto, Y. *et al.* High stability of faecal microbiome composition in guanidine thiocyanate solution at room temperature and robustness during colonoscopy. *Gut* **65**, 1574-1575, doi:10.1136/gutjnl-2016-311937 (2016).

3 Erawijantari, P. P. *et al.* Influence of gastrectomy for gastric cancer treatment on faecal microbiome and metabolome profiles. *Gut* **69**, 1404-1415, doi:10.1136/gutjnl-2019-319188 (2020).

4 Furet, J. P. *et al.* Comparative assessment of human and farm animal faecal microbiota using real-time quantitative PCR. *FEMS Microbiol Ecol* **68**, 351-362, doi:10.1111/j.1574-6941.2009.00671.x (2009).

5 Milanese, A. *et al.* Microbial abundance, activity and population genomic profiling with mOTUs2. *Nat Commun* **10**, 1014, doi:10.1038/s41467-019-08844-4 (2019).

6 Beghini, F. *et al.* Integrating taxonomic, functional, and strain-level profiling of diverse microbial communities with bioBakery 3. *Elife* **10**, doi:10.7554/eLife.65088 (2021).

7 Wood, D. E., Lu, J. & Langmead, B. Improved metagenomic analysis with Kraken 2. *Genome Biol* **20**, 257, doi:10.1186/s13059-019-1891-0 (2019).

8 Yarza, P. *et al.* Uniting the classification of cultured and uncultured bacteria and archaea using 16S rRNA gene sequences. *Nat Rev Microbiol* **12**, 635-645, doi:10.1038/nrmicro3330 (2014).

9 Pasolli, E. *et al.* Accessible, curated metagenomic data through ExperimentHub. *Nat Methods* **14**, 1023-1024, doi:10.1038/nmeth.4468 (2017).

10 Yu, J. *et al.* Metagenomic analysis of faecal microbiome as a tool towards targeted non-invasive biomarkers for colorectal cancer. *Gut* **66**, 70-78, doi:10.1136/gutjnl-2015-309800 (2017).

11 Zeller, G. *et al.* Potential of fecal microbiota for early-stage detection of colorectal cancer. *Mol Syst Biol* **10**, 766, doi:10.15252/msb.20145645 (2014).

12 Vogtmann, E. *et al.* Colorectal Cancer and the Human Gut Microbiome: Reproducibility with Whole-Genome Shotgun Sequencing. *PLoS One* **11**, e0155362, doi:10.1371/journal.pone.0155362 (2016).

13 Wirbel, J. *et al.* Meta-analysis of fecal metagenomes reveals global microbial signatures that are specific for colorectal cancer. *Nat Med* **25**, 679-689, doi:10.1038/s41591-019-0406-6 (2019).

14 Yachida, S. *et al.* Metagenomic and metabolomic analyses reveal distinct stage-specific phenotypes of the gut microbiota in colorectal cancer. *Nat Med* **25**, 968-976, doi:10.1038/s41591-019-0458-7 (2019).

15 Rynazal, R. *et al.* Leveraging explainable AI for gut microbiome-based colorectal cancer classification. *Genome Biol* **24**, 21, doi:10.1186/s13059-023-02858-4 (2023).

16 Li, H. & Durbin, R. Fast and accurate short read alignment with Burrows-Wheeler transform. *Bioinformatics* **25**, 1754-1760, doi:10.1093/bioinformatics/btp324 (2009).

17 Li, H. *et al.* The Sequence Alignment/Map format and SAMtools. *Bioinformatics* **25**, 2078-2079, doi:10.1093/bioinformatics/btp352 (2009).

18 Nik-Zainal, S. *et al.* The life history of 21 breast cancers. *Cell* **149**, 994-1007, doi:10.1016/j.cell.2012.04.023 (2012).

19 Yachida, S. *et al.* Comprehensive Genomic Profiling of Neuroendocrine Carcinomas of the Gastrointestinal System. *Cancer Discov* **12**, 692-711, doi:10.1158/2159-8290.CD-21-0669 (2022).

20 Martincorena, I. *et al.* Universal Patterns of Selection in Cancer and Somatic Tissues. *Cell* **171**, 1029-1041 e1021, doi:10.1016/j.cell.2017.09.042 (2017).

21 Islam, S. M. A. *et al.* Uncovering novel mutational signatures by de novo extraction with SigProfilerExtractor. *Cell Genom* **2**, None, doi:10.1016/j.xgen.2022.100179 (2022).

22 Gerstung, M. *et al.* The evolutionary history of 2,658 cancers. *Nature* **578**, 122-128, doi:10.1038/s41586-019-1907-7 (2020).

23 Rosenthal, R., McGranahan, N., Herrero, J., Taylor, B. S. & Swanton, C. DeconstructSigs: delineating mutational processes in single tumors distinguishes DNA repair deficiencies and patterns of carcinoma evolution. *Genome Biol* **17**, 31, doi:10.1186/s13059-016-0893-4 (2016).

24 Dobin, A. *et al.* STAR: ultrafast universal RNA-seq aligner. *Bioinformatics* **29**, 15-21, doi:10.1093/bioinformatics/bts635 (2013).

25 Anders, S., Pyl, P. T. & Huber, W. HTSeq--a Python framework to work with high-throughput sequencing data. *Bioinformatics* **31**, 166-169, doi:10.1093/bioinformatics/btu638 (2015).

26 McIver, L. J. *et al.* bioBakery: a meta'omic analysis environment. *Bioinformatics* **34**, 1235-1237, doi:10.1093/bioinformatics/btx754 (2018).

27 Cristescu, R. *et al.* Pan-tumor genomic biomarkers for PD-1 checkpoint blockade-based immunotherapy. *Science* **362**, doi:10.1126/science.aar3593 (2018).

28 Hirayama, Y. *et al.* Activity-Based Probe for Screening of High-Colibactin Producers from Clinical Samples. *Org Lett* **21**, 4490-4494, doi:10.1021/acs.orglett.9b01345 (2019).

29 Kawanishi, M. *et al.* In vitro genotoxicity analyses of colibactin-producing E. coli isolated from a Japanese colorectal cancer patient. *J Toxicol Sci* **44**, 871-876, doi:10.2131/jts.44.871 (2019).

30 Kawanishi, M. *et al.* Genotyping of a gene cluster for production of colibactin and in vitro genotoxicity analysis of Escherichia coli strains obtained from the Japan Collection of Microorganisms. *Genes Environ* **42**, 12, doi:10.1186/s41021-020-00149-z (2020).
